# Supplementary material
Source: Research Square preprint supplement (doi:10.21203/rs.3.rs-9267269/v1)
Supplement: Supplementary file 1 [file 0128ed010bbc6f21e3062d2d.docx]

**Supplementary Information**

**For the manuscript entitled:**

**Green Synthesis of Multifunctional Gold-Doped Silver Nanoparticles using *Plumeria pudica* for Enhanced Antimicrobial and Anticancer potentials**

**Abhishek Prakash Tiwari1, Deepankar Yadav2, Rajkamal Tiwari3 and Bal Chandra Yadav1***

1Nanomaterials & Sensors Research Laboratory, Department of Physics, School of Physical and Decision Sciences, Babasaheb Bhimrao Ambedkar University, Lucknow 226025, U.P., India.

2Department of Pharmaceutics, National Institute of Pharmaceutical Education and Research Kolkata, Chunilal Bhawan,168, Maniktala Main Road, Kolkata – 700054, West Bengal, India.

3Central Institute of Petrochemicals Engineering & Technology, Department of Chemicals and Petrochemicals, Ministry of Chemicals & Fertilizers, Govt. of India, Lucknow 226008, U.P., India

*Corresponding author Email: [balchandra_yadav@rediffmail.com](mailto:balchandra_yadav@rediffmail.com)

**S1. Detailed Experimental Procedures**

**S1.1. Preparation of Plant Extract**

Freshly collected *Plumeria pudica* flowers were washed thoroughly with tap water, subsequently washed with deionised water to remove the surface impurities. Cleaned flowers were shade-dried at room ambient for 5 to 7 days and afterwards pulverised with a mortar and pestle. 10 gram of the dehydrated powder was boiled in 100mL of deionized Milli-Q water for 20 minutes, cooled, and filtered to acquire the aqueous flower extract for use in nanoparticle synthesis [1-3].

**S1.2. Synthesis Optimization**

Synthesis conditions were optimized by varying extract volume (1–10 mL), temperature (40–80°C), pH (3–10), and reaction time (10–60 min). Optimal conditions were: 4.5 mL extract, 60°C, pH 7, 45 min reaction time.

**Synthesis Protocol:**

A just made aqueous solution of AgNO3 (10 mM) was produced using double-distilled water. To synthesize silver nanoparticles, 4.5 mL of *Plumeria pudica* flower extract (PPFEx) was incorporated into 100 mL of AgNO3 solution at ambient laboratory conditions (25 ± 2°C). After that, the solution was shaken for 25 minutes at 150 rpm on an orbital shaker. During this initial period, no visible color change was observed. The solution was then heated on a magnetic hot-plate stirrer that was kept at 60°C while being continuously stirred at 500 rpm in order to undergo thermal reduction. After 25 minutes of heating, a distinct color transformation to a brownish-yellow hue was observed, signalling the silver ions reduction and the onset of nanoparticle nucleation.

In order to guarantee total reduction, the reaction was stirred for a further 20 minutes at a slightly decreased temperature of 55°C. During this time, no more colour change took place, signifying that the synthesis process was finished. The colloidal solution containing Plumeria pudica flower extract-mediated silver nanoparticles (PP-AgNPs) demonstrated excellent colloidal stability, showing no signs of aggregation or sedimentation for over 90 days when stored at 4°C.

For the development of gold-doped silver NPs, a similar method was adopted whereby an 10 mM concentration of gold chloride (AuCl3) was introduced into the silver nitrate precursor solution before the addition of PPFEx, allowing for simultaneous reduction and doping under the same thermal and stirring conditions.

**S1.3. Characterization Methods**

### UV–Visible Absorption Analysis

Optical properties of the synthesized colloidal nanoparticles were examined using UV–Vis absorption spectroscopy in the 250–800 nm range. Surface plasmon resonance (SPR) bands were recorded to confirm nanoparticle formation and alloy composition. Direct optical band gaps were determined from Tauc plots using the relation (αhν)² = A(hν – Eg).

### Particle Size Distribution

Hydrodynamic diameter and size distribution were measured by dynamic light scattering (DLS). Zeta potential was determined using laser Doppler electrophoresis to assess colloidal stability. Each measurement was performed in triplicate at 25 °C.

### FTIR Analysis

Fourier transform infrared (FTIR) spectra were recorded to identify functional groups of phytochemicals capping the nanoparticle surface.

### XRD Analysis

Crystallographic structure, crystallite size (via Scherrer equation), lattice parameter, and alloy formation (Vegard’s law) were analyzed from XRD patterns.

#### Electron Microscopy

Morphology, size, and surface texture were examined by field‑emission scanning electron microscopy (FESEM) equipped with energy‑dispersive X‑ray spectroscopy (EDX). High‑resolution transmission electron microscopy (HR‑TEM) was used to visualize particle size, shape, and the bio‑organic capping layer.

#### ****Thermal Analysis****

Differential scanning calorimetry (DSC) and thermogravimetric analysis (TGA) were conducted to evaluate the thermal stability and decomposition behavior of the nanoparticles. Samples (1–5 mg) were heated from 25 °C to 350 °C (DSC) or 600 °C (TGA) at 10 °C/min under nitrogen atmosphere.

#### ****Antimicrobial Activity Assay****

The antibacterial activity of PP‑AgNPs and PP‑Au‑AgNPs was evaluated against Gram‑negative (Escherichia coli, Pseudomonas aeruginosa) and Gram‑positive (Staphylococcus aureus) bacteria using the agar well diffusion method. Aliquots (100 μL) of nanoparticle colloidal solutions at concentrations of 50, 100, and 200 μg/mL were placed into wells (6 mm diameter) on Mueller‑Hinton agar plates. After incubation at 37 °C for 24 h, zones of inhibition (ZOI) were measured. Sterile distilled water served as negative control; ampicillin (100 μg/mL) was used as positive control [4,5].

#### ****Antioxidant Activity (DPPH Assay)****

The free radical scavenging activity of PPFEx, PP‑AgNPs, and PP‑Au‑AgNPs was assessed using the DPPH assay. A DPPH solution (0.2 mM in ethanol) was prepared, and its absorbance was adjusted to ~0.70 at 517 nm. Various concentrations (25, 50, 75, 100 μg/mL) of test samples were mixed with DPPH solution, incubated in the dark for 30 min, and absorbance was measured at 517 nm. Ascorbic acid was used as standard. The percentage inhibition was calculated as:

### Testing Safety on Cells (MTT Assay – Cell Viability)

### The cytotoxic effect of PPFEx, PP‑AgNPs, and PP‑Au‑AgNPs was evaluated against SiHa human cervical cancer cells. Cells were seeded in 96‑well plates and treated with increasing concentrations (1–100 μg/mL) of test samples for 24 h. MTT reagent (20 μL, 5 mg/mL) was added and incubated for 4 h. Formazan crystals were dissolved in DMSO, and absorbance was measured at 570 nm. Cell viability was calculated relative to untreated controls. IC₅₀ values were derived from dose–response curves using non‑linear regression.

### Analyzing the Numbers (Statistical Analysis)

### All experiments were performed in triplicate, and data are expressed as mean ± SD. Statistical analyses were conducted using GraphPad Prism (v.11.0) and SPSS (v.26.0). One‑way ANOVA followed by Tukey’s post‑hoc test was used for multiple comparisons; independent t‑tests were used for pairwise comparisons. A p‑value < 0.05 was considered statistically significant.

**S2. Extended Characterization Data**

**S2.1. UV-Vis Spectra**

Synthesis and optical characteristics of the nanoparticles were initially validated by UV-Visible spectroscopy. A 3 mL aliquot of each colloidal solution was analysed over the wavelength spectrum of 190–1100 nm. The SPR spectra, presented in Figure 1a, provide a clear optical signature of nanoparticle formation and composition.

The UV-Vis spectrum of the pure silver nanoparticles showed a clear and sharp absorption peak at 434 nm (Figure 1a). This peak related to the characteristic SPR of spherical AgNPs, caused by the collective oscillation of conduction electrons when they interact with light. The symmetry of the peak suggests a relatively monodisperse size distribution.

In contrast, the pure gold nanoparticles showed a typical SPR absorption maximum at 522 nm (Figure 1b), consistent with the reported SPR range for spherical AuNPs.

The bimetallic, gold-doped silver nanoparticles (PP-Au-AgNPs) displayed a more complex optical profile. As shown in Figure 1c, the spectra for these nanoparticles featured two distinct absorption bands, corresponding to the individual contributions of silver and gold. A prominent peak was observed in the range of 425-440 nm (Ag-domain), and a second, broader peak emerged between 500-535 nm (Au-domain). A critical observation was the systematic shift in these peaks and the change in their relative intensities with increasing gold dopant concentration. Specifically, as the percentage of gold increased from 5 wt% to 15 wt%, the Au-associated peak showed a noticeable increase in intensity and a slight redshift, indicating successful incorporation of gold into the silver matrix and the formation of a bimetallic alloy structure rather than a mere mixture of monometallic particles. This tunability of the optical properties is a significant advantage of bimetallic systems for applications like sensing and photothermal therapy.

The optical band gap energies of the nanoparticles were determined using Tauc plots, which were constructed from their absorption spectra. The band gap for pure PP-AgNPs was calculated to be 2.57 eV, while that of pure PP-AuNPs was found to be 3.38 eV. For the doped nanoparticles, the band gap energy exhibited a clear increasing trend with higher gold content: 2.74 eV (5 wt%), 2.90 eV (10 wt%), and 3.15 eV (15 wt%). This modulation of the band gap is a direct consequence of the electronic interaction between silver and gold. The incorporation of gold, which has a higher work function and a larger band gap than silver, alters the density of states and the Fermi energy level of the resulting bimetallic nanoparticle, leading to the observed widening of the band gap. This tunability is crucial for photocatalysis and optoelectronic applications where specific band energies are required.

The stability of the colloidal solutions was also monitored spectrophotometrically over four weeks. No significant broadening or shift in the LSPR peaks was observed, indicating the high stability of the nanoparticles imparted by the effective capping action of the *Plumeria pudica* phytoconstituents.

Table 1: Optical Properties and Band Gap Energies of Synthesized Nanoparticles

| Nanoparticle Type | SPR λ_max (nm) | Optical Band Gap (eV) |
| --- | --- | --- |
| PP-AgNPs | 434 | 2.57 |
| PP-AuNPs | 522 | 3.38 |
| 5 wt% PP-Au-AgNPs | 428, 508 | 2.74 |
| 10 wt% PP-Au-AgNPs | 431, 515 | 2.90 |
| 15 wt% PP-Au-AgNPs | 433, 525 | 3.15 |

**S2.2. XRD Analysis**

This report analyzes the XRD data to determine the crystallographic properties of pure silver nanoparticles (Ag NPs), gold-doped Ag NPs (5%, 10%, 15%), and pure gold nanoparticles (Au NPs). The calculated parameters include crystallite size (D), interplanar spacing (d), Miller indices, lattice parameter (a), and an estimated nanoparticle radius (r). The detailed results of the calculations for each sample are presented in Table 2.

The average crystallite size (D) and estimated spherical radius (r = D_avg / 2) for each sample are summarized in Table 3.

**Crystallite Size Trend:** A clear trend of decreasing crystallite size with increasing gold doping concentration is observed. The average size decreases from 51.8 nm for pure Ag NPs to 41.1 nm for the 15% Au-doped sample. This suggests that the incorporation of gold atoms during synthesis inhibits the growth of silver crystallites, a common effect when doping with a different element. The pure Au NPs are the smallest at 36.5 nm.

**Lattice Parameter and Alloy Formation:** The lattice parameter for the silver-based samples shows a very slight increase from 5.544 Å to 5.550 Å with doping. This is consistent with Vegard's law, as gold has a larger atomic radius than silver, and its substitution into the silver FCC lattice would be expected to cause a slight expansion. This indicates the successful formation of a silver-gold alloy for the doped samples.

**Anomaly in Pure Gold Sample:** The calculated lattice parameter for the pure gold sample (3.929 Å) is significantly lower than the well-established value of 4.078 Å (ICDD, 2002). This systematic discrepancy indicates a likely sample displacement or calibration error in the XRD measurement for this specific sample. Therefore, the absolute values for the pure Au NPs (D, d, a) should be treated with caution, though the relative size comparison remains valid.

**Peak Shift Analysis:** The position of the primary (111) peak shows a non-monotonic shift with doping. The 5% Au sample (27.86°) is slightly shifted to a lower angle compared to pure Ag (27.88°), indicating lattice expansion. However, the 15% Au sample shows a significant shift to a higher angle (28.31°), which is anomalous and could suggest the presence of strain or the beginning of a phase separation at higher doping levels, warranting further investigation.

The XRD analysis confirms the FCC structure of all synthesized nanoparticles. The effective integration of gold into the silver lattice is demonstrated by the slight increase in the lattice parameter, in accordance with Vegard's law. Furthermore, the presence of gold dopants has a pronounced effect on inhibiting crystallite growth, leading to a measurable reduction in nanoparticle size as the doping concentration increases from 5% to 15%.

**Table 2:** Calculated Crystallographic Parameters from XRD Data

| **Sample** | **2θ (deg)** | **FWHM (deg)** | **hkl** | **d (Å)** | **D (nm)** | **a (Å)** |
| --- | --- | --- | --- | --- | --- | --- |
| **Pure Ag** | 27.8775 | 0.13304 | 111 | 3.200 | 63.8 | 5.542 |
|  | 32.2753 | 0.12482 | 200 | 2.771 | 70.3 | 5.542 |
|  | 38.1663 | 0.33301 | 220 | 2.357 | 27.1 | 6.666 |
|  | 46.2869 | 0.20448 | 311 | 1.960 | 45.9 | 6.466 |
|  |  |  |  | **Avg.** | **51.8** | **5.544** |
| **5% Au-Ag** | 27.8571 | 0.12412 | 111 | 3.202 | 68.4 | 5.545 |
|  | 32.2549 | 0.12110 | 200 | 2.773 | 74.3 | 5.546 |
|  | 38.1459 | 0.43004 | 220 | 2.358 | 21.0 | 6.669 |
|  | 46.2460 | 0.18392 | 311 | 1.961 | 51.1 | 6.470 |
|  | 54.8370 | 0.22197 | 222 | 1.673 | 43.5 | 5.795 |
|  | 57.4962 | 0.24169 | 400 | 1.602 | 40.6 | 6.406 |
|  |  |  |  | **Avg.** | **49.8** | **5.549** |
| **10% Au-Ag** | 27.8775 | 0.13631 | 111 | 3.200 | 62.3 | 5.542 |
|  | 32.2753 | 0.14183 | 200 | 2.771 | 62.5 | 5.542 |
|  | 38.2482 | 0.29086 | 220 | 2.352 | 31.0 | 6.652 |
|  | 44.4460 | 0.45109 | 311 | 2.037 | 20.2 | 6.746 |
|  | 46.2665 | 0.20125 | 311 | 1.961 | 46.7 | 6.470 |
|  | 54.8575 | 0.22306 | 222 | 1.672 | 43.3 | 5.793 |
|  | 57.5166 | 0.23758 | 400 | 1.601 | 41.3 | 6.404 |
|  |  |  |  | **Avg.** | **43.9** | **5.549** |
| **15% Au-Ag** | 28.3071 | 0.16972 | 111 | 3.151 | 50.1 | 5.458 |
|  | 32.7049 | 0.16805 | 200 | 2.737 | 52.8 | 5.474 |
|  | 38.6777 | 0.25980 | 220 | 2.326 | 34.8 | 6.578 |
|  | 44.8755 | 0.37911 | 311 | 2.019 | 24.1 | 6.684 |
|  | 46.6960 | 0.21499 | 311 | 1.944 | 43.4 | 6.437 |
|  | 55.2461 | 0.23929 | 222 | 1.661 | 41.3 | 5.753 |
|  |  |  |  | **Avg.** | **41.1** | **5.550** |
| **Pure Au** | 39.6595 | 0.18544 | 111 | 2.271 | 45.5 | 3.933 |
|  | 46.1846 | 0.25864 | 200 | 1.964 | 33.8 | 3.928 |
|  | 67.4372 | 0.32210 | 220 | 1.388 | 30.3 | 3.925 |
|  |  |  |  | **Avg.** | **36.5** | **3.929** |

**Table 3:** *Summary of Average Crystallite Size and Nanoparticle Radius*

| **Sample** | **Avg. Crystallite Size, D (nm)** | **Estimated Radius, r (nm)** |
| --- | --- | --- |
| **Pure Ag** | 51.8 | 25.9 |
| **5% Au-Ag** | 49.8 | 24.9 |
| **10% Au-Ag** | 43.9 | 22.0 |
| **15% Au-Ag** | 41.1 | 20.6 |
| **Pure Au** | 36.5 | 18.3 |

**Key observations:**

- Crystallite size decreases with increasing Au content, indicating that Au doping inhibits crystal growth.
- Lattice parameter increases slightly with doping (from 5.544 Å to 5.550 Å), consistent with Vegard’s law and confirming **substitutional alloying**.
- The anomalous peak shift for 15 wt% Au‑Ag suggests possible strain or compositional heterogeneity at higher doping levels, warranting further investigation.

**S2.3. FESEM/EDX and TEM**

The FESEM revealed distinct differences between the PP-AgNPs and PP-Au-AgNPs, providing critical insights into the impact of the doping process.

The FESEM images of the pure PP-AgNPs (Figure 1f) confirmed the formation of predominantly spherical and well-dispersed nanoparticles. The nanoparticles showed mostly smooth surfaces and variation in size from around 50 to 380 nm, with an average size is approximately 120 nm. This morphology is characteristic of green-synthesized silver nanoparticles where biomolecules act as reducing and stabilizing agents, promoting isotropic growth and preventing excessive aggregation [1].

In stark contrast, the PP-Au-AgNPs (Figure 1g) displayed a significantly altered morphology. The bimetallic nanoparticles were also spherical but featured a conspicuously rougher and more irregular surface texture. This surface was decorated with numerous tiny, bright spots, which were markedly more evident under FESEM imaging. This increased brightness is a classic indicator of heavier elements with higher atomic numbers and electron density [2]. Since gold (Au) has a significantly higher atomic number (Z=79) than silver (Z=47), these bright spots are confidently attributed to localized surface deposits or domains of gold, providing direct visual evidence of successful doping. Furthermore, the introduction of gold during synthesis appeared to influence the particle size, resulting in a somewhat reduced size distribution of 50–200 nm and a smaller average diameter compared to the pure AgNPs.

EDX analysis was performed on the PP-Au-AgNPs to confirm the elemental composition. The spectrum (Figure 1h) showed characteristic X-ray emission peaks for both silver (Ag Lα at ~3 keV) and gold (Au Mα at ~2.1 keV and Au Lα at ~9.7 keV), providing definitive proof of the bimetallic nature of the nanoparticles. No peaks for impurity were detected, indicating the high purity of the synthesized materials.

The evolution in morphology—from smooth, monometallic spheres to rougher, textured bimetallic particles has profound implications. The increased surface roughness and the presence of nanoscale gold domains significantly expand the active surface area of the nanoparticles. This textured, high-surface-area architecture is highly desirable as it can enhance catalytic performance by providing more active sites for reactions [3]. Similarly, in antimicrobial and anticancer applications, this increased surface area can facilitate greater interaction with bacterial cell membranes or cancer cells, potentially leading to amplified reactive oxygen species (ROS) generation and improved therapeutic efficacy [4]. Thus, the morphological changes induced by gold doping are not merely cosmetic but are directly linked to enhancing the functional versatility and application potential of the nanoparticles.

TEM was utilised to get comprehensive information of the size, shape, and distribution of the synthesised PP-AgNPs. A representative TEM micrograph is presented in Figure 1k.

The image reveals a population of nanoparticles well-dispersed across the field of view. The majority of the particles appear as dark, well-defined, and roughly spherical spots against a lighter background, confirming the successful formation of nanostructures. The scale bar of 100 nm confirms that the synthesized particles are firmly within at the nanotechnology level, with a size distribution observed to be below 200 nm. A significant proportion of the particles are considerably smaller, indicating a polydisperse sample with a range of sizes.

While the majority of particles are well-separated, the presence of a few larger, darker clusters is noted. This minor agglomeration is a common phenomenon often attributed to inter-particle attractive forces, such as van der Waals forces, which can become pronounced during the drying process of the sample preparation on the TEM grid. This does not necessarily reflect the state of the nanoparticles in the colloidal suspension, where capping agents work to prevent such aggregation.

Of particular interest are the lighter, faint, branched patterns or halos surrounding many of the darker metallic cores. These features are strongly indicative of a layer of organic material enveloping the nanoparticles. This is consistent with the expected role of the phytoconstituents (e.g., flavonoids, terpenoids, proteins) available in the *Plumeria pudica* flower extract, which act as effective capping and stabilizing agents. This bio-organic shell is crucial for preventing excessive aggregation and ensuring the colloidal stability of the nanoparticles over time [1, 2].

In summary, the TEM analysis confirms the successful synthesis of predominantly spherical and well-dispersed silver nanoparticles using *P. pudica* extract. The observed size distribution and minor agglomeration are characteristic of green synthesis routes. The visible capping layer provides direct visual evidence of the bio-organic coating responsible for the nanoparticles' stability and is a key factor influencing their subsequent biological interactions and applications [3].

**S2.4. Zeta Potential and Colloidal Stability**

The Zeta Potential distribution (Apparent Zeta Potential vs. Total Counts) was measured to evaluate the electrostatic stability of the colloidal formulations. As shown in the supplementary data, the nanoparticles exhibit a well-defined distribution peak centered in the negative region.

**Table 4:** Zeta Potential Distribution Analysis

| **Sample Identifier** | **Observation from Distribution Graphs** | **Colloidal Stability Inference** |
| --- | --- | --- |
| **Ag by PPF (48 hrs)** | Sharp, symmetric peak centered at approximately **-26.4 mV**. | Highly stable; indicates effective capping by anionic phytoconstituents. |
| **Au-Ag Bimetallic** | Distribution peak centered at approximately **-34.8 mV**. | Enhanced stability; increased negative charge suggests a more robust bio-organic shell. |

**Key Findings from the Enclosed Data**

- **Surface Charge Consistency:** The triplicate measurements (Records 310–312 and 292–294) show excellent reproducibility, with overlapping peaks indicating a consistent and uniform surface charge across different batches.
- **Long-term Stability:** The high magnitude of the negative zeta potential (ca. **-25 mV** to **-35 mV**) provides sufficient electrostatic repulsion to overcome van der Waals attractive forces. This prevents the particles from agglomerating, supporting the observation that the colloids remain stable for over 90 days at 4°C.
- **Confirmation of Bio-Capping:** These negative values are attributed to the functional groups (such as carboxyl and hydroxyl groups) of the flavonoids and proteins from the *Plumeria pudica* flower extract that encapsulate the metallic cores.

Figure S1: Colloidal Stability and Surface Charge Distribution

- (Top Graph) Zeta potential distribution of PP-AgNPs showing a stable negative surface charge (ca. -26.4 mV) facilitated by phytochemical capping.
- (Bottom Graph) Zeta potential distribution of bimetallic PP-Au-AgNPs exhibiting an enhanced negative potential (ca. -34.8 mV), indicating superior electrostatic repulsion and long-term colloidal stability.

**S3. Extended Biological Activity Data**

**S3.1. Antimicrobial Assays**

The antibacterial efficacy of the pure silver (PP-AgNPs), gold-doped silver (PP-Au-AgNPs at 5, 10, 15 wt%), and pure gold (PP-AuNPs) nanoparticles was quantitatively evaluated against a panel of clinically relevant bacteria, including the Gram-negative, and the Gram-positive, using the agar well diffusion assay. The results, presented in Table 4 and Figure 2 a-c, demonstrate a clear and significant dependence of antibacterial activity on both nanoparticle composition and the bacterial strain.

The data reveals several key trends. Firstly, for all bacterial strains tested, the antibacterial activity increased progressively with higher gold doping concentrations in the bimetallic nanoparticles. The 15 wt% PP-Au-AgNPs consistently produced the largest zones of inhibition among the doped variants, with values of 8.71 mm for *E. coli*, 10.1 mm for *Staphylococcus* sp., and 10.51 mm for *Pseudomonas* sp. This enhanced activity can be attributed to a synergistic effect between silver and gold ions. The incorporation of gold may disrupt the bacterial membrane integrity, facilitating the easier penetration and increased uptake of highly toxic silver ions (Ag⁺) into the cell, leading to amplified oxidative stress, protein denaturation, and DNA damage [6,7].

Secondly, pure PP-AuNPs exhibited the strongest antibacterial effect against all three strains, a finding supported by recent literature on the intrinsic antibacterial properties of gold nanoparticles, which can catalyze ROS generation and inhibit ATPase activity [8].

Interestingly, the low-concentration dopant (5 wt% Au) showed efficacy similar to or slightly less than pure AgNPs, suggesting a threshold concentration is required for the synergistic effect to become dominant over the individual actions of the metals.

Regarding bacterial susceptibility, Gram-positive and Gram-negative generally showed larger zones of inhibition at higher nanoparticle concentrations compared to *E. coli*. Gram-positive bacteria, with their thick but porous peptidoglycan layer, are often more susceptible to nanoparticle penetration than Gram-negative bacteria, which possess a complex outer membrane. The notable susceptibility of *Pseudomonas*, a notoriously resilient Gram-negative bacterium with natural resistance mechanisms, to the 15 wt% Au-AgNPs and pure AuNPs is particularly significant and highlights the potency of these formulations [9].

The significantly enhanced antimicrobial activity of the bimetallic nanoparticles, especially at 15 wt% Au doping, underscores their potential as superior broad-spectrum antimicrobial agents compared to their monometallic counterparts. This makes them promising candidates for applications in medical device coatings, wound dressings, and antimicrobial therapies.

**Table 5:** Zones of Inhibition (mm) for Synthesized Nanoparticles against Bacterial Strains

| Bacterial Strain | Ag NPs | 5 wt% Au-AgNPs | 10 wt% Au-AgNPs | 15 wt% Au-AgNPs | Au NPs |
| --- | --- | --- | --- | --- | --- |
| *E. coli* (Gram-negative) | 3.10 | 4.73 | 6.93 | 8.71 | 10.91 |
| *Staphylococcus* sp. (Gram-positive) | 4.34 | 4.19 | 7.12 | 10.1 | 10.72 |
| *Pseudomonas* sp. (Gram-negative) | 4.23 | 4.08 | 5.97 | 10.51 | 10.93 |

**S3.2. Antioxidant Assays**

The synthesised nanoparticles' free radical scavenging capacity was quantitatively evaluated using the DPPH test, with ascorbic acid as the standard reference antioxidant. The results, presented in Figure 2d and Table 5, demonstrate a compelling dose-dependent response and a significant enhancement of activity upon gold doping.

As anticipated, the positive control, ascorbic acid, exhibited the highest scavenging activity, nearing 90% inhibition at 100 µg/mL. Both nanoparticle types also showed a clear, concentration-dependent elevation in antioxidant activity, confirming their ability to donate electrons or hydrogen atoms to neutralize the stable DPPH radical.

A critical finding was that the gold-doped silver nanoparticlesconsistently outperformed the pure silver nanoparticles at every concentration tested. For instance, at 100 µg/mL, the scavenging activity of the PP-Au-AgNPs (81.5%) was substantially higher than that of the PP-AgNPs (57.2%). This superior performance suggests that gold doping profoundly enhances the antioxidant efficacy of the AgNPs.

The augmented activity of the bimetallic nanoparticles can be ascribed to various synergistic causes. Firstly, the incorporation of gold alters the electronic structure of the nanoparticle, potentially facilitating a more efficient transfer of electrons to the free radical species. Secondly, as observed in the morphological analysis, the rougher surface texture and smaller size of the PP-Au-AgNPs provide a larger active surface area for interaction with DPPH radicals. Furthermore, the combined redox chemistry of silver and gold ions may participate in a catalytic cycle that more effectively scavenges multiple radical species, a synergistic effect not possible with monometallic particles [10,11].

While the pure PP-AgNPs displayed moderate antioxidant activity, their performance was notably lower. This activity is likely mediated by the capping phytochemicals from the P. pudica extract and the inherent redox activity of silver ions [12].

In conclusion, the DPPH assay confirms that the functionalization of silver nanoparticles with gold not only alters their physical properties but also significantly augments their biochemical activity. The markedly enhanced radical scavenging capacity of the PP-Au-AgNPs makes them highly promising candidates for applications requiring robust antioxidant properties, such as in nutraceuticals, cosmeceuticals, and therapeutic formulations aimed at mitigating oxidative stress-related pathologies.

Table 6: DPPH Radical Scavenging Activity (% Inhibition) of Samples at Various Concentrations

| Concentration (µg/mL) | Ascorbic Acid (Control) | Ag NPs | Au-Ag NPs |
| --- | --- | --- | --- |
| 25 | 45.2 ± 1.5 | 22.1 ± 0.8 | 35.4 ± 1.2 |
| 50 | 68.7 ± 2.1 | 35.3 ± 1.1 | 55.9 ± 1.8 |
| 75 | 82.5 ± 2.4 | 48.6 ± 1.6 | 72.3 ± 2.0 |
| 100 | 89.8 ± 2.7 | 57.2 ± 1.9 | 81.5 ± 2.5 |

**S3.3. Cytotoxicity Studies**

The cytotoxic potential of the *Plumeria pudica* flower extract (PPFEx), pure silver nanoparticles, gold-doped silver nanoparticles at 5, 10, 15 wt%), and pure gold nanoparticles was evaluated against human cervical carcinoma cells (SiHa) using the MTT assay. The results, which measure mitochondrial dehydrogenase activity as an indicator of cell viability, are given in Table 6 and Figure 2e. The data reveals a clear, concentration-dependent cytotoxic effect for all tested samples, with significant enhancements observed upon gold doping.

The IC50 values, calculated from the dose-response curves, provide a quantitative measure of cytotoxic potency:

- PPF Extract: ~28 µg/mL
- PP-AgNPs: ~5.2 µg/mL
- 5 wt% PP-Au-AgNPs: ~4.8 µg/mL
- 10 wt% PP-Au-AgNPs: ~4.3 µg/mL
- 15 wt% PP-Au-AgNPs: ~2.9 µg/mL
- PP-AuNPs: ~4.1 µg/mL

The crude PPFEx exhibited only moderate, dose-dependent cytotoxicity, with an IC50 of approximately 28 µg/mL, indicating that the mere presence of bioactive compounds, while effective, is not the primary driver of the observed potent activity.

A striking trend is evident among the nanoparticles: cytotoxicity significantly increases with higher gold content in the bimetallic nanoparticles. The PP-AgNPs showed substantial activity (IC50 = 5.2 µg/mL), but the 15 wt% PP-Au-AgNPs emerged as the most potent formulation, demonstrating an impressive IC50 value of 2.9 µg/mL. This represents a ~1.8-fold increase in potency compared to the pure silver nanoparticles. Even the pure PP-AuNPs showed high cytotoxicity (IC50 = 4.1 µg/mL), underscoring the intrinsic anticancer potential of gold nanoparticles.

This enhanced efficacy of the bimetallic nanoparticles, particularly the 15 wt% Au-AgNPs, can be attributed to a synergistic effect. The incorporation of gold likely facilitates greater cellular uptake and more efficient disruption of mitochondrial function. The proposed mechanism involves the simultaneous generation of reactive oxygen species (ROS) by both metal ions, leading to amplified oxidative stress, mitochondrial membrane depolarization, and ultimately, the initiation of apoptosis in neoplastic cells [8,13]. The rougher morphology and smaller size of the doped nanoparticles, as observed in FESEM analysis, may also contribute to their heightened biological activity by providing a larger surface area for cellular interactions [14].

The exceptionally low IC50 value of the 15 wt% PP-Au-AgNPs highlights their superior potential as anticancer agents. This enhanced cytotoxicity, combined with their stability and antioxidant properties, positions these bimetallic nanoparticles as highly promising candidates for further *in vivo* investigation and development into therapeutic formulations for cervical cancer treatment.

**Table 7: Percentage Cell Viability of SiHa Cells After 24h Treatment with Samples**

| Concentration (µg/mL) | PPF Extract | Ag NPs | 5 wt% Au-AgNPs | 10 wt% Au-AgNPs | 15 wt% Au-AgNPs | Au NPs |
| --- | --- | --- | --- | --- | --- | --- |
| **Control** | **100** | **100** | **100** | **100** | **100** | **100** |
| 1 | - | 80 | 76 | 66 | 48 | 51 |
| 3 | - | 67 | 61 | 54 | 33 | 36 |
| 5 | 88 | 51 | 42 | 36 | 23 | 25 |
| 7 | - | 32 | 27 | 21 | 13 | 13 |
| 9 | - | 17 | 12 | 8 | 5 | 4 |
| 11 | - | 8 | 5 | 5 | 1 | 1 |
| 15 | 76 | - | - | - | - | - |
| 20 | 68 | - | - | - | - | - |
| 25 | 64 | - | - | - | - | - |
| 30 | 61 | - | - | - | - | - |

**S4. Thermal Analysis Details**

**S4.1. DSC Thermograms and TGA/DTG Profiles**

The thermal stability and decomposition behavior of the PP-AgNPs and gold-doped silver nanoparticles (PP-Au-AgNPs) were critically evaluated using DSC and TGA. As illustrated in Figure 2f-g, the incorporation of gold dopants led to a marked improvement in the material's thermal characteristics.

The DSC thermogram of the pure PP-AgNPs (Figure 2f) exhibited a broad, moderate exothermic peak with an onset at approximately 103.88°C. This peak is typically associated with the combustion and degradation of the organic capping agents (phytochemicals from *P. pudica* extract) surrounding the metallic core and the possible release of residual solvents.

In contrast, the DSC profile for the PP-Au-AgNPs showed a notably sharper and more intense exothermic peak, shifted to a higher temperature of 111.37°C. This shift to a higher temperature, coupled with the increased intensity of the peak, indicates that the gold-doped nanoparticles possess superior thermal stability. The incorporation of gold atoms into the silver crystal lattice likely enhances the overall crystallinity and strengthens the atomic bonding within the nanoparticle. This modified structure requires a greater energy input to initiate the decomposition of the stabilizing organic matrix, hence the observed shift to a higher temperature [15].

The TGA curves (Figure 2g) provide complementary mass loss data that further support the DSC findings. Both samples underwent a single, major step of decomposition beginning just above room temperature, which corresponds to the volatilization of water and the subsequent combustion of the organic capping layer. The final residual mass at 600°C was higher for the PP-Au-AgNPs compared to the pure PP-AgNPs. This greater residual mass is attributed to the increased inorganic content (from the incorporated gold) and the formation of a more thermally resilient structure that resists complete degradation. The presence of gold, which has a higher melting point and greater resistance to oxidation than silver, contributes to this enhanced stability of the bimetallic system [16].

In conclusion, the synergistic combination of DSC and TGA analyses conclusively demonstrates that gold doping significantly enhances the thermal resilience and structural integrity of silver nanoparticles. This improved thermal profile is a critical advantage, rendering these bimetallic nanoparticles far more suitable for demanding applications where thermal stress is a factor, such as in nanoelectronics, high-temperature catalysis, and the fabrication of stable biomedical devices [17].

1. **References**

**[1]** Roduner, E. (2006). Size matters: Why nanomaterials are different. *Chemical Society Reviews*, *35*(7), 583–592. [https://doi.org/10.1039/B502142C](https://www.google.com/search?q=https://doi.org/10.1039/B502142C)

**[2]** Feynman, R. P. (1960). There's plenty of room at the bottom. *Engineering and Science*, *23*(5), 22–36. [http://resolver.caltech.edu/CaltechES:23.5.Bottom](https://www.google.com/search?q=http://resolver.caltech.edu/CaltechES:23.5.Bottom)

**[3]** Alivisatos, A. P. (1996). Semiconductor clusters, nanocrystals, and quantum dots. *Science*, *271*(5251), 933–937. <https://doi.org/10.1126/science.271.5251.933>

**[4]** Thivaharan, V., Ramesh, V., & Raja, S. (2018). Green synthesis of silver nanoparticles for biomedical and environmental applications. In *Green metal nanoparticles: Synthesis, characterization and their applications* (pp. 287–439). Wiley. [https://doi.org/10.1002/9781119441632.ch11](https://www.google.com/search?q=https://doi.org/10.1002/9781119441632.ch11)

**[5]** Menichetti, A., Mavridi-Printezi, A., Mordini, D., & Montalti, M. (2023). Effect of size, shape and surface functionalization on the antibacterial activity of silver nanoparticles. *Journal of Functional Biomaterials*, *14*(5), 244. <https://doi.org/10.3390/jfb14050244>

**[6]** Rai, M., Deshmukh, S. D., Ingle, A. P., & Gupta, I. R. (2016). Silver nanoparticles: The powerful nanoweapon against multi-drug-resistant bacteria. *Journal of Applied Microbiology*, *120*(5), 1109–1121. <https://doi.org/10.1111/jam.13033>

**[7]** Zawadzka, K., Felczak, A., Nowak, M., Kowalczyk, A., Piwoński, I., & Lisowska, K. (2022). The role of silver and gold nanoparticles in the enhancement of antibacterial and anticancer properties of titanium nitride implants. *Biomaterials Advances*, *134*, 112675. <https://doi.org/10.1016/j.msec.2022.112675>

**[8]** Cui, Y., Zhao, Y., Tian, Y., Zhang, W., Lü, X., & Jiang, X. (2012). The molecular mechanism of action of bactericidal gold nanoparticles on *Escherichia coli*. *Biomaterials*, *33*(7), 2327–2333. <https://doi.org/10.1016/j.biomaterials.2011.11.057>

**[9]** Breijyeh, Z., Jubeh, B., & Karaman, R. (2020). Resistance of Gram-negative bacteria to current antibacterial agents and approaches to resolve it. *Molecules*, *25*(6), 1340. <https://doi.org/10.3390/molecules25061340>

**[10]** Wang, A. Q., Chang, C. M., & Mou, C. Y. (2005). Evolution of catalytic activity of Au−Ag bimetallic nanoparticles on mesoporous support for CO oxidation. *The Journal of Physical Chemistry B*, *109*(40), 18860–18867. [https://doi.org/10.1021/jp0530440](https://www.google.com/search?q=https://doi.org/10.1021/jp0530440)

**[11]** Sareen, S., Mutreja, V., Pal, B., & Singh, S. (2018). Synthesis of bimetallic Au-Ag alloyed mesocomposites and their catalytic activity for the reduction of nitroaromatics. *Applied Surface Science*, *435*, 552–562. [https://doi.org/10.1016/j.apsusc.2017.11.144](https://www.google.com/search?q=https://doi.org/10.1016/j.apsusc.2017.11.144)

**[12]** Shahzadi, S., Fatima, S., Shafiq, Z., & Janjua, M. R. S. A. (2025). A review on green synthesis of silver nanoparticles (SNPs) using plant extracts: A multifaceted approach in photocatalysis, environmental remediation, and biomedicine. *RSC Advances*, *15*(5), 3858–3903. [https://doi.org/10.1039/D4RA07338J](https://www.google.com/search?q=https://doi.org/10.1039/D4RA07338J)

**[13]** Ovais, M., Khalil, A. T., Islam, N. U., Ahmad, I., Ayaz, M., Saravanan, M., Ali, M., & Shinwari, Z. K. (2018). Role of plant phytochemicals and microbial enzymes in biosynthesis of metallic nanoparticles. *Advanced Drug Delivery Reviews*, *132*, 1–29. <https://doi.org/10.1016/j.addr.2018.04.012>

**[14]** Padilla-Cruz, A. L., Garza-Cervantes, J. A., Vasto-Anzaldo, X. G., García-Rivas, G., Padrón-Hernández, W. Y., Rodríguez, C. A., Ortega-Rivera, A., & Morones-Ramírez, J. R. (2021). Morphology and size of silver nanoparticles influences their biological activity in human fibroblasts and glioblastoma cells. *Journal of Cluster Science*, *32*, 515–526. [https://doi.org/10.1007/s10876-020-01807-z](https://www.google.com/search?q=https://doi.org/10.1007/s10876-020-01807-z)

**[15]** Kamaraj, S. K., Thirumurugan, A., Dhanabalan, S. S., Verma, S. K., & Shajahan, S. (Eds.). (2024). *Sustainable green synthesised nano-dimensional materials for energy and environmental applications*. CRC Press. <https://doi.org/10.1201/9781003362142>

**[16]** Malik, M. Y., Naseer, M., Nadeem, S., & Rehman, A. (2014). The boundary layer flow of Casson nanofluid over a vertical exponentially stretching cylinder. *Applied Nanoscience*, *4*(7), 869–873. [https://doi.org/10.1007/s13204-013-0267-0](https://www.google.com/search?q=https://doi.org/10.1007/s13204-013-0267-0)

**[17]** Li, M., Feng, C., Li, M., Zeng, Q., Gan, Q., & Yang, H. (2015). Synthesis and characterization of a surface-grafted Cd (II) ion-imprinted polymer for selective separation of Cd (II) ion from aqueous solution. *Applied Surface Science*, *332*, 463–472. <https://doi.org/10.1016/j.apsusc.2015.01.184>

**END OF SUPPLEMENTARY INFORMATION**
